# Supplementary material for: Enhanced Rabies Surveillance to Support Effective Oral Rabies Vaccination of Raccoons in the Eastern United States
Source: PubMed Central journal article supplement (PMC6082093; doi:10.3390/tropicalmed2030034), 2017-07-28
Supplement: tropicalmed-02-00034-s001.pdf [file tropicalmed-02-00034-s001.pdf]

# **Supplementary Material: Enhanced Rabies Surveillance to Support Effective Oral Rabies Vaccination of Raccoons in the Eastern United States**

Jordona D. Kirby, Richard B. Chipman, Kathleen M. Nelson, Charles E. Rupprecht,  
Jesse D. Blanton, Timothy P. Algeo and Dennis Slate

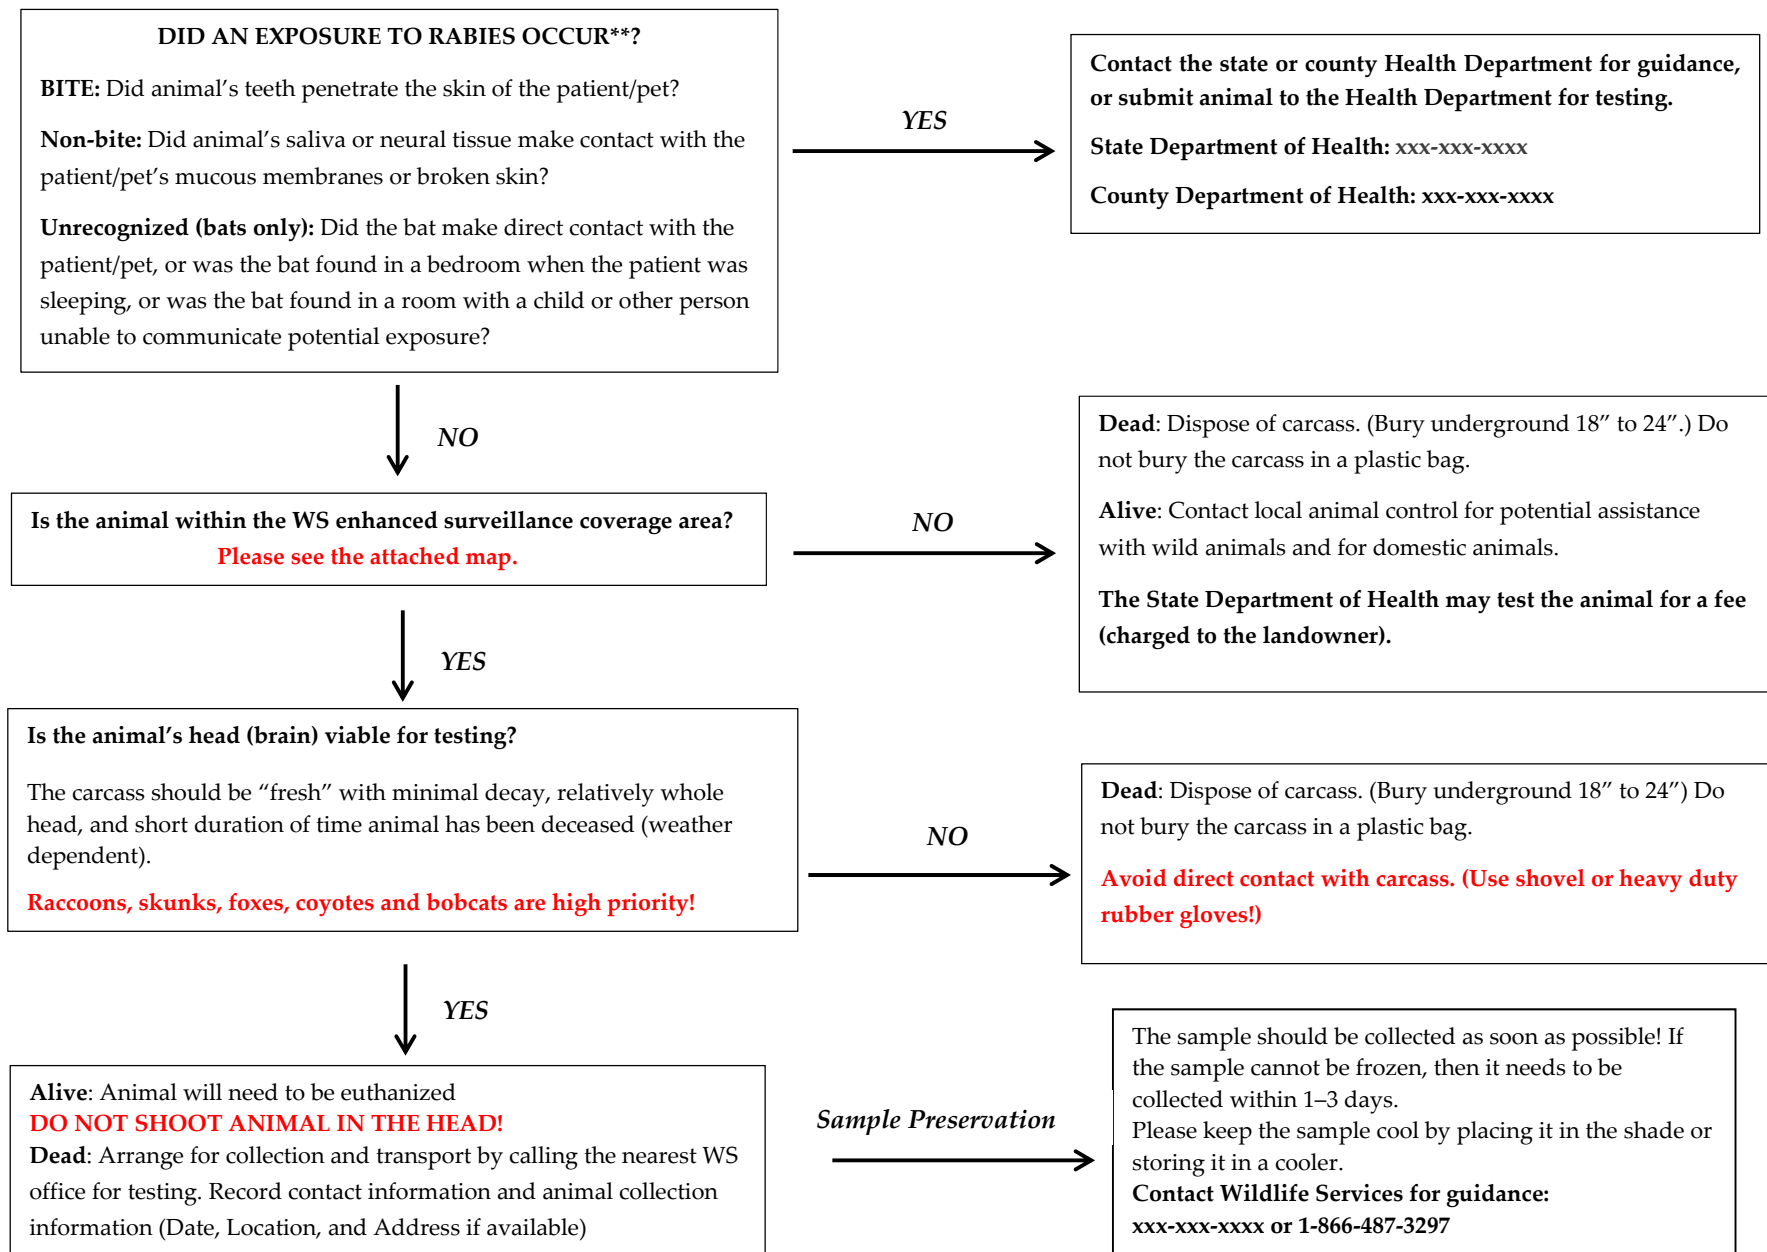

Figure S1. Call Algorithm Template for Enhanced Rabies Surveillance.
